# Supplementary material for: A novel proline-rich M-superfamily conotoxin that can simultaneously affect sodium, potassium and calcium currents
Source: PubMed Central journal article supplement (PMC8230863; doi:10.1590/1678-9199-jvatitd-2020-0164), 2021-06-11
Supplement: 1678-9199-jvatitd-27-e20200164-s1.pdf [file 1678-9199-jvatitd-27-e20200164-s1.pdf]

**Supplementary Material to “A novel proline-rich M-superfamily conotoxin that can simultaneously affect sodium, potassium and calcium currents”**

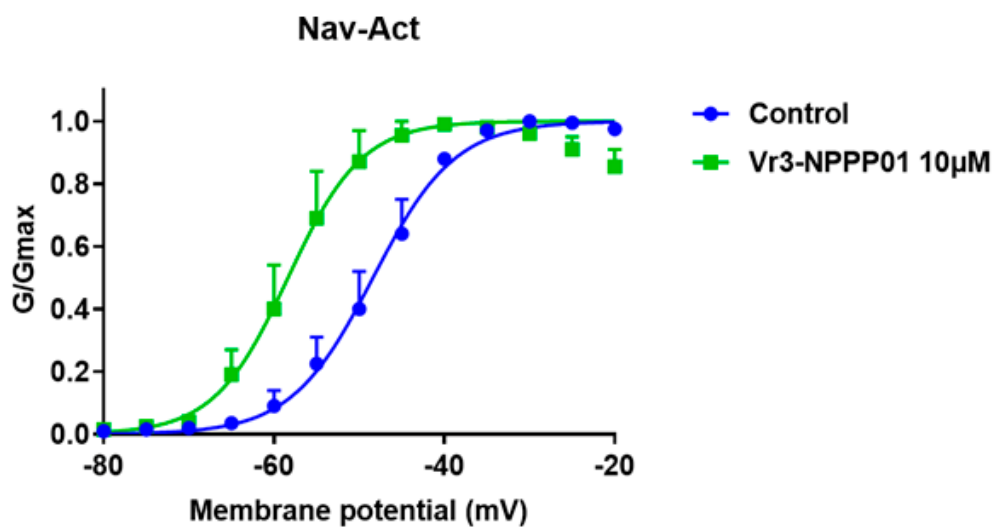

|                 | Control | Vr3-NPPP01 10µM |
|-----------------|---------|-----------------|
| Best-fit values |         |                 |
| Bottom          | = 0.000 | = 0.000         |
| Top             | = 1.000 | = 1.000         |
| V50             | -48.37  | -58.35          |
| Slope           | 4.809   | 4.335           |
| Std. Error      |         |                 |
| V50             | 1.113   | 2.156           |
| Slope           | 0.9803  | 1.899           |

**Additional file 1.** Effects of 10 µM Vr3a (Vr3-NPPP01) on the activation of sodium channel currents in DRG neurons.
