# Supplementary material for: A novel proline-rich M-superfamily conotoxin that can simultaneously affect sodium, potassium and calcium currents
Source: PubMed Central journal article supplement (PMC8230863; doi:10.1590/1678-9199-jvatitd-2020-0164), 2021-06-11
Supplement: 1678-9199-jvatitd-27-e20200164-s3.pdf [file 1678-9199-jvatitd-27-e20200164-s3.pdf]

**Supplementary Material to “A novel proline-rich M-superfamily conotoxin that can simultaneously affect sodium, potassium and calcium currents”**

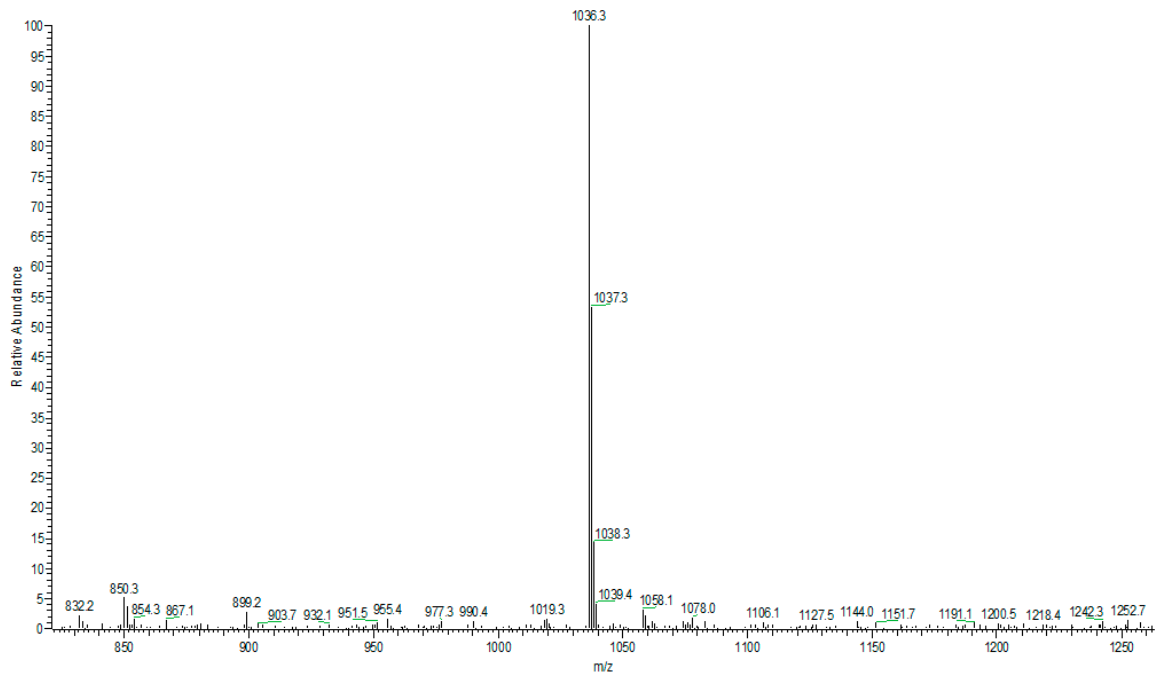

**Additional file 3.** Monoisotopic molecular mass spectrum of Vr3a.
